# Supplementary material for: A positive feedback loop between Gli1 and tyrosine kinase Hck amplifies shh signaling activities in medulloblastoma
Source: PubMed Central journal article supplement (PMC4670963; doi:10.1038/oncsis.2015.38), 2015-11-30

## Supplementary Information

### Supplementary Figure Legends

**Figure S1. Nucleotide sequence of the 1.7-kb genomic DNA around the *Hck* transcription start site.**

Positions are given relative to the transcription start site (TSS, +1) of the *Hck* gene. The boxed regions indicate ChIP-qPCR products. The potential Gli binding motif is indicated.

**Figure S2. Comparison of human and mouse Gli1 protein sequences.** The conserved Tyr residues are marked with upper case “Y” below the sequence. The lower case “y” indicates the tyrosine residues present only in mouse or human Gli1. The zinc-finger domain is indicated.

**Figure S3. Phosphorylation of Gli1 mutants by Hck.** (A) Map of Gli1 constructs relative to the full-length Gli1 protein. Several conserved Tyr residues are marked. (B) NIH3T3 cells were co-transfected with constructs expressing Hck and different HA-tagged Gli1 proteins. Cell lysates were precipitated with 4G10 antibody and probed with anti-HA. Phosphorylation of all Gli1 constructs was detected.

**Figure S4. Sufu interacts with non-phosphorylated Gli1 proteins.** NIH3T3 cells were transfected with constructs expressing HA-Gli1 and Flag-Sufu proteins in the presence or absence of exogenous HA-Hck. Cell lysates were precipitated with anti-Flag antibodies and antibodies against HA or Flag were used for western blot. Phosphorylated Gli1 bands (which migrate more slowly) were detected in the input protein lysate (marked by a \*) but not in the Flag-precipitated compartment in the presence of exogenous Hck.

**Figure S5. Hck is highly expressed in Shh-type medulloblastoma** (A) Microarray analyses (NCBI Geo Datasets GSE9299) indicate that both *Gli1* and *Hck* but not *Src* mRNA levels are higher in SmoM2 induced medulloblastoma than in normal cerebellum controls. (B) Microarray analyses (GSE34126) indicate that *Hck* mRNA levels in mouse *Ptch1*-null Shh-type medulloblastomas are higher than those in normal stem cells and those in Myc-driven Group 3 like medulloblastomas.

## Supplementary Tables

**Table S1 Sequences of PCR-Primers**

|           |                           |
|-----------|---------------------------|
| Gli1F     | GGTCTCGGGGTCTCAAACCTGC    |
| Gli1R     | CGGCTGACTGTGTAAGCAGAG     |
| Gli15UTRF | GCTGGAGGTCTGCGTGGTAGAG    |
| Gli15UTRR | GAGGAGGAGGAGGAAAGAGAGATCC |
| HckhmF    | TCACTGGTGTGTAAGATTGCTG    |
| HckhmR    | GGGTTTGACATACCTGGGTAAG    |
| HckmF     | CAAGTCTTCGTCGCTTGCTC      |
| HckmR     | CGGAGGAACCTGGACTTCAC      |
| Ptch1F    | GAAGCCACAGAAAACCCTGTC     |
| Ptch1R    | GCCGCAAGCCTTCTCTAGG       |
| SufuF     | ATGGCCGGCACTTCACCTACAAG   |
| SufuR     | GGCCAGCTGTA CTCTTTGGGAAG  |
| GapdhF    | GTGGTGAAGCAGGCATCTGA      |
| GapdhR    | GCCATGTAGGCCATGAGGTC      |

Figure S1

|       |                    |                    |                    |                    |                    |                    |                         |                    |
|-------|--------------------|--------------------|--------------------|--------------------|--------------------|--------------------|-------------------------|--------------------|
| -1575 | GCTGCCTTTA         | TTGGCTTCTT         | TCCCATCTCA         | ATCTCCTTCA         | CTCAGTAGAT         | AACAAGCATT         | GTTTACTGCT              | ACACAGACTA         |
|       | CGACGAAAT          | AACCGAAGAA         | AGGGTAGAGT         | TAGAGGAAGT         | GAGTCATCTA         | TTGTTTCGTAA        | CAAAATGACGA             | TGTGTCTGAT         |
| -1495 | ATTTCACTTC         | TGTGTCCAAG         | TCAATTAAAC         | CTGTTCAAGA         | CTCGGTCTAT         | TTTTAGAAAT         | AGGGCATGAA              | TATATTAATA         |
|       | TAAAGTGAAG         | ACACAGGTTT         | AGTTAATTTG         | GACAAGTTCT         | GAGCCAGATA         | AAAATCTTTA         | TCCCGTACTT              | ATATAATTTT         |
| -1415 | TACATAGCAA         | ACACATTAGT         | GTTGGGTGAC         | TGGGATTTCT         | ACGTGGGCTG         | GGGACCAGGC         | TGTGTAGGAG              | GCAGCTCTGG         |
|       | ATGTATCGTT         | TGTGTAATCA         | CAACCCACTG         | ACCCTAAAGA         | TGCACCCGAC         | CCCTGGTCCG         | ACACATCCTC              | CGTCGAGACC         |
|       |                    |                    |                    |                    |                    |                    | <i>EcoRI</i>            |                    |
| -1335 | TTGTCAGAAC         | TGCTACTGGG         | CCTAGCGGGT         | GGAActCTAG         | AGCTGCTAAC         | ACCGCTCGCG         | CTCA <b>GAATTC</b>      | ATACTTAAAA         |
|       | AACAGTCTTG         | ACGATGACCC         | GGATCGCCCA         | CCTTGAGATC         | TCGACGATTG         | TGGCGAGCGC         | GAGTCTTAAG              | TATGAATTTT         |
| -1255 | CATAGTACTG         | CTAAACGCAT         | GCCTACATGC         | ACGCGTAAGC         | GAATGAATGA         | GAGATACTGG         | TGGTCTGGCC              | TGGCTAGAGG         |
|       | GTATCATGAC         | GATTTGCGTA         | CGGATGTACG         | TGCGCATTCG         | CTTACTTACT         | CTCTATGACC         | ACCAGACCCG              | ACCGATCTCC         |
|       |                    |                    | <i>PstI</i>        |                    |                    |                    |                         |                    |
| -1175 | AGGGAGGACT         | CCTGTACGTT         | <b>CTGCGAG</b> GTG | TGTGTTGCAG         | TTTAGAGAGT         | GTTGGTCCCT         | GTCGTTTTGA              | ATGATGTCTC         |
|       | TCCCTCCTGA         | GGACATGCAA         | AGACGTCCAC         | ACACAACGTC         | AAATCTCTCA         | CAACCAGGGA         | CAGCAAAACT              | TACTACAGAG         |
|       |                    |                    |                    |                    |                    |                    | <b>Gli binding site</b> |                    |
| -1095 | AGGCTGAGTG         | GAATATGCCA         | TGCAAACAGG         | ACCTCAGTGG         | TCTGCCAGTA         | AGACTTCCTC         | TCTTCAACTT              | <b>GGGAGGTCCT</b>  |
|       | TCCGACTCAC         | CTTATACGGT         | ACGTTTGTCC         | TGGAGTCACC         | AGACGGTCAT         | TCTGAAGGAG         | AGAAGTTGAA              | CCCTCCAGGA         |
| -1015 | CTGAGCAGTC         | CCATATTCAG         | CCCAGAATAA         | GGCAAAGAAC         | TCCCGGGGGC         | GCCAGACTTT         | GCATGGAGTT              | TGAATAAGCG         |
|       | <b>GACTCGTCAG</b>  | <b>GGTATAAGTC</b>  | <b>GGGTCTTATT</b>  | <b>CCGTTTCTTG</b>  | <b>AGGGCCCGCC</b>  | <b>CGGTCTGAAA</b>  | <b>CGTACCTCAA</b>       | <b>ACTTATTCGC</b>  |
| -935  | GTGGGTGGGC         | GGGTGGAGGG         | AAAACCGCTG         | CATGTGGGAG         | GGACCGAAGT         | GGAAGGGCGG         | TGGAGACCCA              | CCAGAATCCT         |
|       | CACCCACCCG         | CCCACCTCCC         | TTTTGGCGAC         | GTACACCCTC         | CCTGGCTTCA         | CCTTCCCGCC         | ACCTCTGGGT              | GGTCTTAGGA         |
| -855  | AGAGGGAGAG         | GTTAGACTTA         | TCAGGGCGTG         | GTTAGACTTA         | AAGGGAGCTA         | CATTCCTTCT         | GCGGCTGGTT              | TAGGATCTTT         |
|       | TCTCCCTCTC         | CAATCTGAAT         | AGTCCGCAC          | CAATCTGAAT         | TTCCCTCGAT         | GTAAGGAAGA         | CGCCGACCAA              | ATCCTAGAAA         |
| -775  | GAAAGGAAGG         | ATAGGATCGG         | TTGATTGCTC         | CAGTGCAGGA         | TTTAGGACCT         | ATGGGATTAA         | GGTCTCGTAG              | GGGGCTGGTG         |
|       | CTTTCCTTCC         | TATCCTAGCC         | AACTAACGAG         | GTCACGTCTC         | AAATCCTGGA         | TACCCTAATT         | CCAGAGCATC              | CCCCGACCAC         |
|       |                    |                    |                    |                    |                    |                    | <i>XhoI</i>             |                    |
| -695  | GCTGTAGTAC         | AAACTACGGA         | GAGAGAGGCC         | CTGGATTCCA         | TTCTCTAGAA         | CACACAAGCG         | CGCGCGCGCG              | CGCT <b>CTCGAG</b> |
|       | CGACATCATG         | TTTGATGCCT         | CTCTCTCCGG         | GACCTAAGGT         | AAGAGATCTT         | GTGTGTTTCG         | GCGCGCGCGC              | GCGAGAGCTC         |
| -615  | ATTAAAACCC         | TTTCAGAAAA         | TTTGATTACA         | AATCTAGAGA         | ATTTGTAGGG         | GTTAGGACTG         | GGAACAGAAT              | AGAAAGTGAG         |
|       | TAATTTTGGG         | AAAGTCTTTT         | AAACTAATGT         | TTAGATCTCT         | TAAACATCCC         | CAATCCTGAC         | CCTTGCTCTA              | TCTTTCACTC         |
| -535  | ATTGAAAATC         | TTTCCCCAGG         | AGGAGGCAGA         | TGGTTTTGCA         | GGTAAAGACG         | CCTGGTGCCA         | AGCGTGGCTG              | CTTGAGTTCA         |
|       | TAACTTTTAG         | AAAGGGGTCC         | TCTCCGTCT          | ACCAAAACGT         | CCATTTCTGC         | GGACCACGGT         | TCGCACCAGC              | GAACTCAAGT         |
| -455  | GTCCCCGGAA         | CTCGGAAGGT         | GGAAGGTAAG         | ATCCTAGTCC         | TCCAAATTGT         | TCTCTAACCT         | CTACACCAGC              | CTGAGGCTCC         |
|       | CAGGGGCCCT         | GAGCCTTCCA         | CCTTCCATTC         | TAGGATCAGG         | AGGTTTAAACA        | AGAGATTGGA         | GATGTGGCGA              | GACTCCGAGG         |
| -375  | AGGGTACTTA         | CACACATAA          | CGGAAACAAT         | CAACCAGTCA         | AACAATAAAC         | GTAATAATAT         | ACAATTTCTT              | AGGGAATCCA         |
|       | TCCCATGAAT         | GTGTGTATGT         | GCCTTTGTTA         | GTTGGTCAAG         | TTGTTATTTG         | CATTTTATAA         | TGTTAAGAAA              | TCCCTTAGGT         |
| -295  | AGGGTATTTG         | GTCTCTTAGG         | TAGGGGTCCA         | AAATCTCTGG         | GGATAGGGTT         | TAGAATCCTT         | TGGACAGGCT              | CATTACATCA         |
|       | TCCCATAAAC         | CAGAGAATCC         | ATCCCCAGGT         | TTTAGAGACC         | CCTATCCCAA         | ATCTTAGGAA         | ACCTGTCCGA              | GTAATGTAGT         |
|       |                    |                    | <i>SpeI</i>        |                    |                    |                    |                         |                    |
| -215  | TGGGGGGCTT         | AAACGC <b>ACTA</b> | <b>GT</b> GGGGGAGG | GGGACTGGGA         | ATCTTGGGAG         | GGCGGGTCAA         | ACCTTGGTGT              | CTGAGTAAGT         |
|       | ACCCCCGAA          | TTTGCGTGAT         | CACCCCTCC          | CCCTGACCCT         | TAGAACCCTC         | CCGCCAGTT          | TGGAACCACA              | GACTCATTCA         |
| -135  | CCTTCAAGGA         | CTGGTTAGCG         | CCCTTGAGGA         | CAGGGTTAGC         | AAAGAAATGC         | TGAAATTTCT         | TGGAGTGAA               | TTTAGAGCAG         |
|       | GGAAGTTCCT         | GACCAATCGC         | GGGAACTCCT         | GTCCCAATCG         | TTTCTTTACG         | ACTTTAAGAA         | ACCTCCACTT              | AAATCTCGTC         |
|       |                    |                    |                    |                    |                    |                    | <b>TSS</b> →            |                    |
| -55   | GAGACAAGAG         | AGCCAGAGTG         | GGAGTTAGGC         | TCTTAGAGGG         | CGGAGTCGGG         | GTATTTGGGG         | GCGGGGTTTG              | CATCACCCAG         |
|       | CTCTGTTCTC         | TCGGTCTCAC         | CCTCAATCCG         | AGAATCTCCC         | GCCTCAGCCC         | CATAAACCCC         | CGCCCCAAAC              | GTAGTGGGTC         |
| +26   | <b>GGTGC</b> GGCTA | <b>AGGC</b> GGCCAG | <b>ATGG</b> CCAGTG | <b>AGCG</b> CCACTG | <b>GGTT</b> GCGGCT | <b>CCC</b> AGCTTGC | <b>ACT</b> CCCCGCG      | <b>GCG</b> GCTCTCA |
|       | CCACGCCGAT         | TCCGCGGGTC         | TACCGGTCAC         | TCGCGGTGAC         | CCAACGCCGA         | GGGTCGAACG         | TGAGGGGCGC              | CGCCGAGAGT         |
| +106  | GACGGGTGGG         | AGGGGACCAA         | AGTCGCCCGT         | GAAG               |                    |                    |                         |                    |
|       | <b>CTGCC</b> ACCC  | <b>TCCC</b> TGGTT  | <b>TCAG</b> CGGGCA | <b>CTTC</b>        |                    |                    |                         |                    |

Figure S2

|        |      |                                                                        |      |
|--------|------|------------------------------------------------------------------------|------|
| Gli1_m | 1    | MFNPMTPPQVNSYSEPCCLRPLHSQGVPSMGTEGLSGLPFCHQANFMSGSQGYGAARETS           | 60   |
| Gli1_h | 1    | MFNSMTPPPISYGEPCCLRPLPSQGAPSVGTEGLSGPPFCHQANLMSGPHSYGPARETN<br>Y Y     | 60   |
| Gli1_m | 61   | SCTEGSLFPPPPPRSSVKLTKKRALSISPLSDASLDLQTVIRTSPSSLVAFINSRCTSP            | 120  |
| Gli1_h | 61   | SCTEGPLFSSP---RSAVKLTKKRALSISPLSDASLDLQTVIRTSPSSLVAFINSRCTSP           | 117  |
| Gli1_m | 121  | GGSYGHLSIGTMSPSLGFPPQMSHQKGTSPPYGVQPCVPHDSTRGSMMLHPQARGPRATC           | 180  |
| Gli1_h | 118  | GGSYGHLSIGTMSPSLGFPAQMNHQKGPSFVQPCGPHDSARGGMIPHPQSRGPFPTC<br>Y y       | 177  |
| Gli1_m | 181  | QLKSELDMMVGKCPEDPLEGDMSSPNSTGIQDHLGMLDGREDLEREEKREPE                   | 240  |
| Gli1_h | 178  | QLKSELDMLVGKCREEPLGDMSSPNSTGIQDPLLGMMLDGREDLEREEKREPE<br>Y             | 237  |
| Gli1_m | 241  | RWDGCSQEFDSQEQLVHHINSEIHGERKEFVCHWGGCSRELRPFKAQYMLVVMRRHTG             | 300  |
| Gli1_h | 238  | RWDGCSQEFDSQEQLVHHINSEIHGERKEFVCHWGGCSRELRPFKAQYMLVVMRRHTG<br>Y        | 297  |
| Gli1_m | 301  | EKPHKCTFEGCRKSYSRLENLKTHLRSHTEGKPYMCEQEGCSKAFSNASDRAKHQNRTHS           | 360  |
| Gli1_h | 298  | EKPHKCTFEGCRKSYSRLENLKTHLRSHTEGKPYMCEHEGCSKAFSNASDRAKHQNRTHS<br>Y Y    | 357  |
| Gli1_m | 361  | NEKPYVCKLPGCTKRYTDPSSLRKHVKTVHGPDHAVTKRHRGDGPLPRAQPLSTVEPKRE           | 420  |
| Gli1_h | 358  | NEKPYVCKLPGCTKRYTDPSSLRKHVKTVHGPDHAVTKRHRGDGPLPRAPSISTVEPKRE<br>Y Y    | 417  |
| Gli1_m | 421  | REGGSGREESRLTVPEASAM-PQQSPGAQSSCSSDHPAGSAANTDSGVEMAGNAGGSTED           | 479  |
| Gli1_h | 418  | REGGPIREESRLTVPEGAMKQPSPGAQSSCSSDHPAGSAANTDSGVEMTGNAGGSTED             | 477  |
| Gli1_m | 480  | LSSLDEGPCVSATGLSTLRLENLRDLQLHQLRPIGSRGLKPLSLTHAGAPVSRRLGPPV            | 539  |
| Gli1_h | 478  | LSSLDEGPCIAGTGLSTLRLENLRDLQLHQLRPIGTRGLKPLSLSHTGTTVSRRVGPV             | 537  |
| Gli1_m | 540  | SLDRSSSSSSMSSAYTVSRRSSLASFPFPGTPPENASSLPLTPAQHYMLRARYASAR              | 599  |
| Gli1_h | 538  | SLERRSSSSSSISSAYTVSRRSSLASFPFPGSPPENASSLPLMPAQHYLLRARYASAR<br>Y Y Y    | 597  |
| Gli1_m | 600  | GSQTPTAAHSLDRMGGLSVPPWRSRTEYPGYNPNAVTRRASDPARAADHPAPARVQRF             | 659  |
| Gli1_h | 598  | GGTSPTAASSLDRIGGLMPPWRSRAEYPGYNPNAVTRRASDPAAADRPAPARVQRF<br>Y Y        | 657  |
| Gli1_m | 660  | KSLGCVHTPPSVA-TGRNFDPHHPTSVYSPQPPSITENVAMDTRGLQEEPEVGTSMVGN            | 718  |
| Gli1_h | 658  | KSLGCVHTPPTVAGGGQNFDPYLPSTSVYSPQPPSITENAAMDARGLQEEPEVGTSMVGS<br>y Y    | 717  |
| Gli1_m | 719  | LNPYMDFSSTDTLGYGGPEGTAAPYEARPGSLPLGPGPPTNYGPGHCAQQVSYDPDTP             | 778  |
| Gli1_h | 718  | LNPYMDFPPTDTLGYGGPEGAAAPYARGPGSLPLGPGPPTNYGPNPCQQASYDPDTP<br>Y Y Y Y Y | 777  |
| Gli1_m | 779  | ENWGEFSPHAGVYPSNKAPGAAYSQCPRLEHYGQVQVKPEQGCPVGSSTGLAPCLNAHP            | 838  |
| Gli1_h | 778  | ETWGEFSPHSGLYPGPKALGGTYSQCPRLEHYGQVQVKPEQGCPVGSSTGLAPCLNAHP<br>Y Y Y   | 837  |
| Gli1_m | 839  | SEGSPGPQLFSSHHPQLPQPYPQSGYPQPPHYLSTEPRLGLNFPSSSHSTGQLKAQ               | 898  |
| Gli1_h | 838  | SEGPPHPQLFSHYPQSPPPQYLSGYPYQPPDYLPSEPRCLDFD-SPTHSTGQLKAQ<br>y Y Y Y    | 896  |
| Gli1_m | 899  | LVCNYVQSQQELLWEGRNRRGLPNQELPYQSPKFLGGSQVSPAKTPAAAAAYGSGFA              | 958  |
| Gli1_h | 897  | LVCNYVQSQQELLWEGGGREDAPAQEPSYQSPKFLGDSQVSPSRAKAP---VNTYGPFG<br>Y Y Y   | 953  |
| Gli1_m | 959  | PASANKSGSYAPSPCHETFTVGNRPSHRPAAPPRLPLSPCYGPKLVGDTNPSCGH                | 1018 |
| Gli1_h | 954  | PNLPNHKSGSYPTSPCHENFVVGANRASHRAAAPRLPLPTCYGPKLVGDTNPSCGH<br>Y Y        | 1013 |
| Gli1_m | 1019 | PEVGRLGAGPALYPPPEGQVCNALDSLDLNNTQLDFVAILDEAQGLSPLSHEQGDSSKN            | 1078 |
| Gli1_h | 1014 | PEVGRLGAGPALYPPPEGQVCNPLDSLDLNNTQLDFVAILDEPQGLSPPPSHDQRGSSGH<br>Y      | 1073 |
| Gli1_m | 1079 | TPSPSGPPNMAVGNMSVLLGSLPGETQFLNSSA                                      | 1111 |
| Gli1_h | 1074 | TPPPSGPPNMAVGNMSVLLRSLPGETQFLNSSA                                      | 1106 |

Figure S3

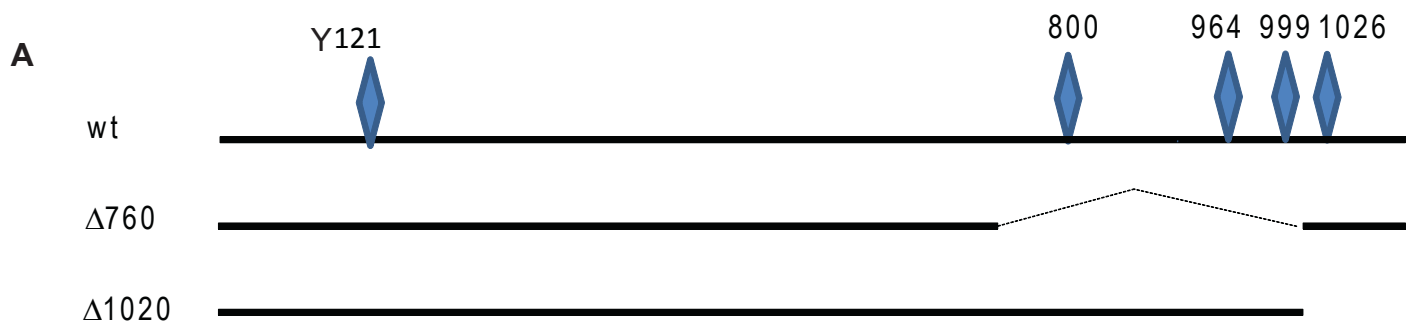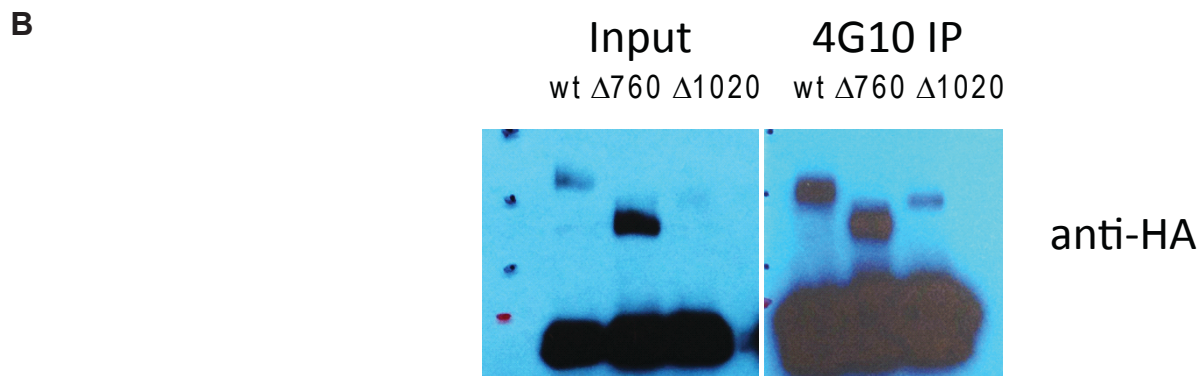

Figure S4

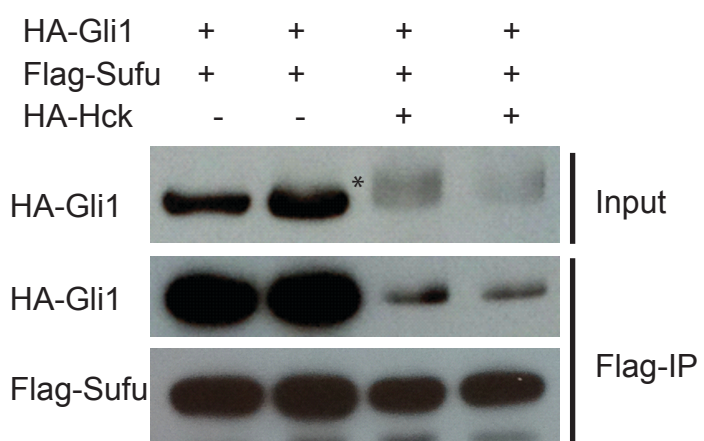

Figure S5 Hck level in human medulloblastoma and mouse medulloblastoma model

**A**

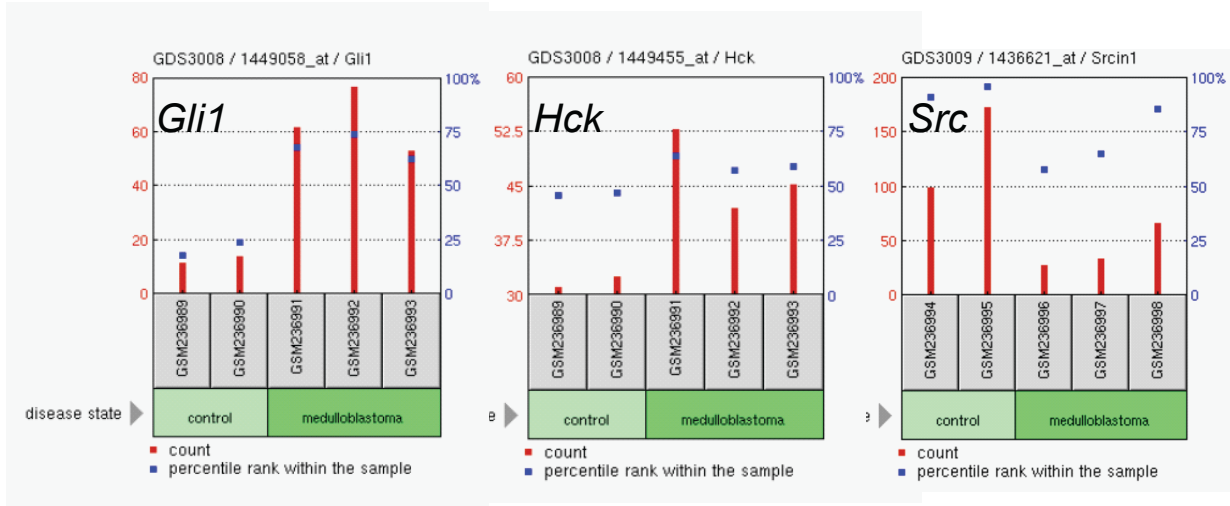

**B**

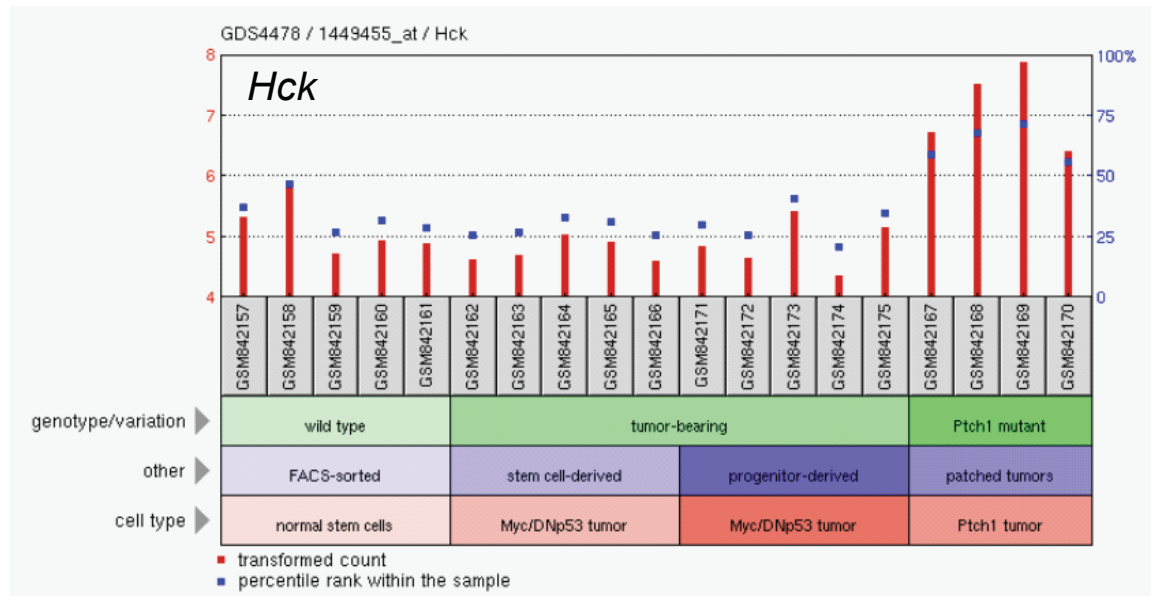

Supplement: oncsis201538x1.pdf [file oncsis201538x1.pdf]
